# Supplementary material
Source: ML conference proceedings conference paper supplement (https://aclanthology.org/2026.codi-1.24)
Supplement: SupplementaryMaterial [file prompt-univ.pdf › latex/prompts/prompt-univ.pdf]

# Prompt

## Role

You are a linguistic annotation assistant...

## Task

Identify all coreferent mentions... Prefer recall...

Include mentions of: NE (people...), pronouns, ...

Exclude mentions of: idiomatic, structure, ...

Mentions may: span multiple tokens, be nested, ...

## Input format

- tokenized: no paragraphs, multi-word tokens, ...

## Output format

- keep text and tokenization, add marks, ...

- EML instructions: start: <eX>, end: </eX>

- linking: hints when to link, prefer shorter spans

**Empty token instructions** - only if applicable

**Example 1**

Input-blind

EML-gold

**Example 2**

Input-blind

EML-gold

**Example 3**

Input-blind

EML-gold

**Input**

Input-blind document

**Output**
