# Supplementary material
Source: ML conference proceedings conference paper supplement (https://aclanthology.org/2026.codi-1.24)
Supplement: SupplementaryMaterial [file prompt.pdf › latex/prompts/prompt.pdf]

# Prompt

## Role

You are a linguistic annotation assistant...

## Task

Identify all coreferent mentions... Prefer recall...

Include mentions of: NE (people...), pronouns, ...

Exclude mentions of: idiomatic, structure, ...

Mention may: span multiple tokens, be nested, ...

## Input format

- tokenized: no paragraphs, fused forms, ...

## Output format

- keep text, add marks, ...

- EML instructions: start: <eX>, end: </eX>

- linking: hints when to link, prefer shorter spans

## Language-dependent hints - e.g. for English:

- personal pronouns: I, you, he, she, it, we, they

- possessives: my, your, his, her, its, our, their

- title and role nouns: Mr., Mrs., doctor, mother, ...

## Empty token instructions - only if applicable

### Example 1

Input-blind

EML-gold

### Example 2

Input-blind

EML-gold

### Example 3

Input-blind

EML-gold

### Input

Input-blind document

### Output
