# Supplementary material
Source: ML conference proceedings conference paper supplement (https://aclanthology.org/2026.codi-1.24)

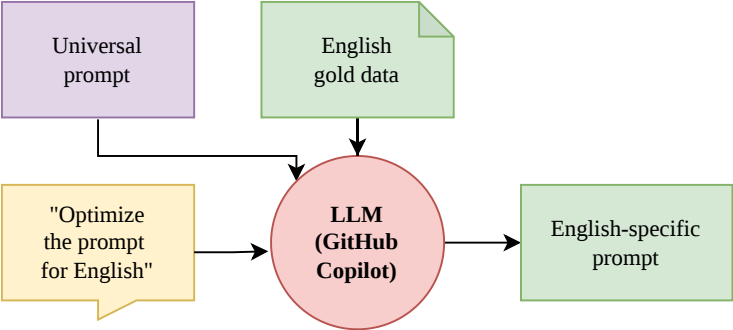

Supplement: SupplementaryMaterial [file prompt-langspec.pdf › latex/prompts/prompt-langspec.pdf]
